# Supplementary material for: Potential Antimicrobial and Anticancer Activities of an Ethanol Extract from Bouea macrophylla
Source: PubMed Central journal article supplement (PMC7221966; doi:10.3390/molecules25081996), 2020-04-24
Supplement: molecules-25-01996-s001.pdf [file molecules-25-01996-s001.pdf]

## **Potential Antimicrobial and Anticancer Activities of Ethanol Extract from *Bouea macrophylla***

Ngoc Hong Nguyen <sup>1</sup>, Thuy Trang Nguyen <sup>2</sup>, Phu Cuong Ma <sup>3</sup>, Qui Thanh Hoai Ta <sup>4</sup>, Thuc Huy Duong <sup>5</sup>, Van Giau Vo <sup>6,7,\*</sup>

<sup>1</sup> *CirTech Institute, Ho Chi Minh City University of Technology, Ho Chi Minh City 700000 and Vietnam.*

<sup>2</sup> *Faculty of Pharmacy, Ho Chi Minh City University of Technology, Ho Chi Minh City 700000, Vietnam.*

<sup>3</sup> *Institute of Applied Science, HCMC University of Technology (HUTECH), Ho Chi Minh City 700000, Vietnam.*

<sup>4</sup> *Institute of Research and Development, Duy Tan University, Danang 550000, Vietnam.*

<sup>5</sup> *Department of Organic Chemistry, University of Education, Ho Chi Minh City 700000, Vietnam.*

<sup>6</sup> *Bionanotechnology Research Group, Ton Duc Thang University, Ho Chi Minh City 700000, Vietnam.*

<sup>7</sup> *Faculty of Pharmacy, Ton Duc Thang University, Ho Chi Minh City 700000, Vietnam*

\* *Correspondence: vovangiau@tdtu.edu.vn*

## Supplementary material

Unknown; InLib=-211

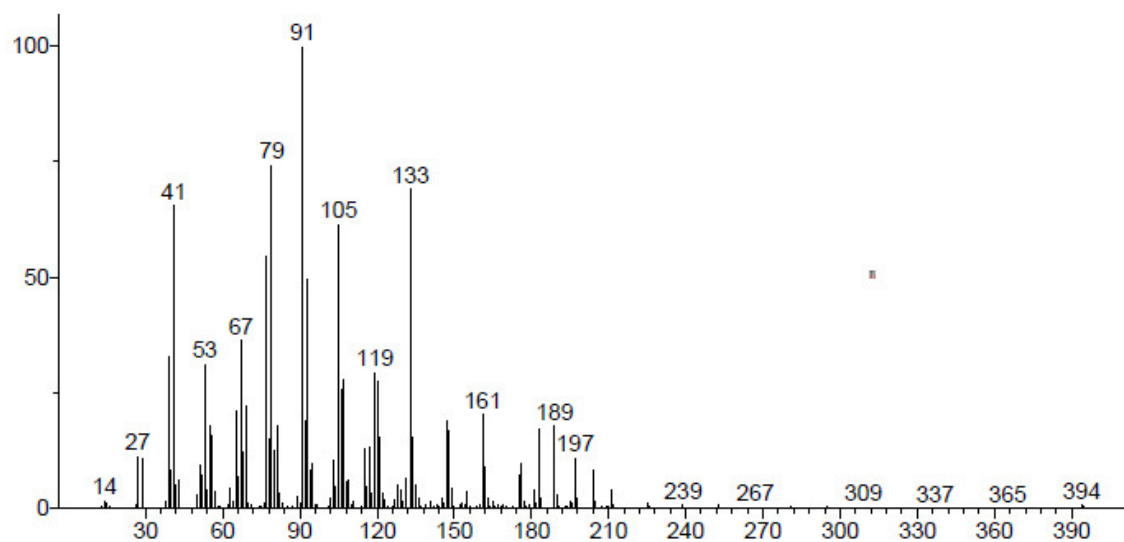

(Text File) Scan 1215 (15.603 min): THTRA03.D

Hit 1 : Caryophyllene

C<sub>15</sub>H<sub>24</sub>; MF: 847; RMF: 900; Prob 17.4%; CAS: 87-44-5; Lib: mainlib; ID: 60555.

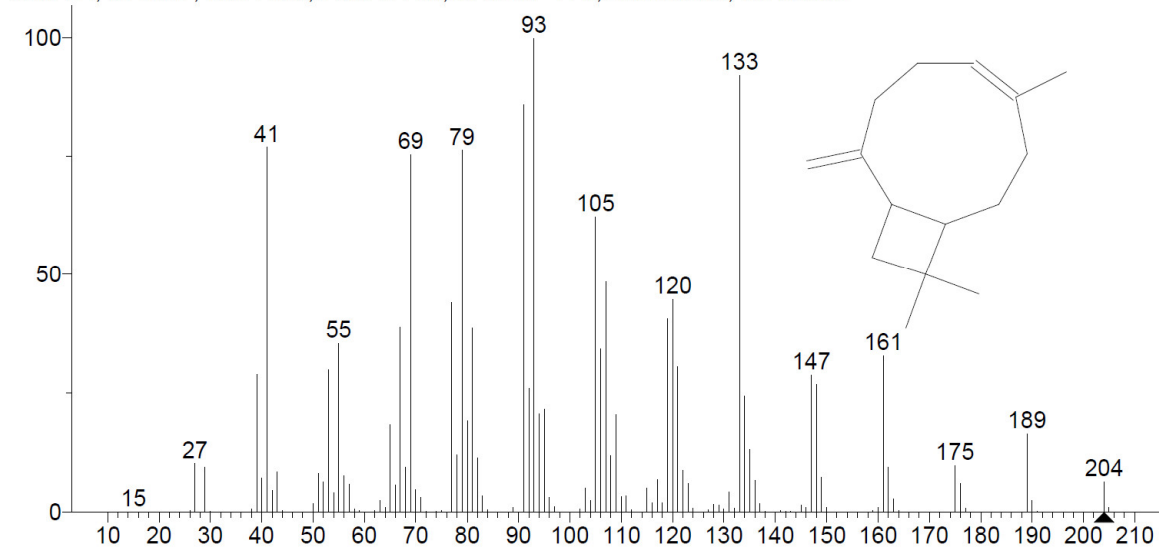

(mainlib) Caryophyllene

**Figure S1.** Peak assignment identified from Caryophyllene by GC-MS method.

Unknown; InLib=-201

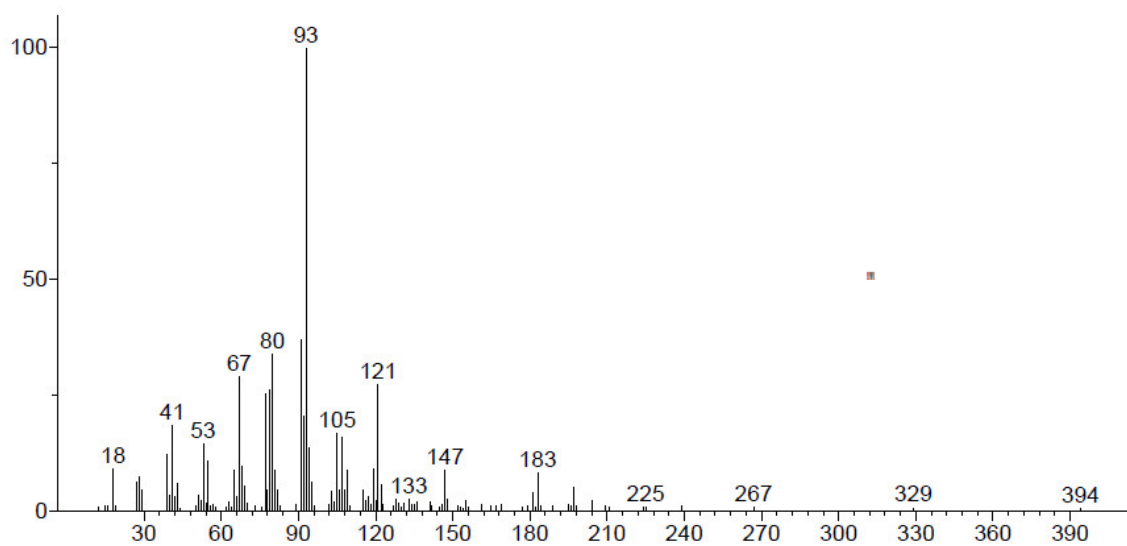

(Text File) Scan 1262 (16.091 min): THTRA03.D

Hit 1 : Humulene

C<sub>15</sub>H<sub>24</sub>; MF: 830; RMF: 909; Prob 47.9%; CAS: 6753-98-6; Lib: replib; ID: 13046.

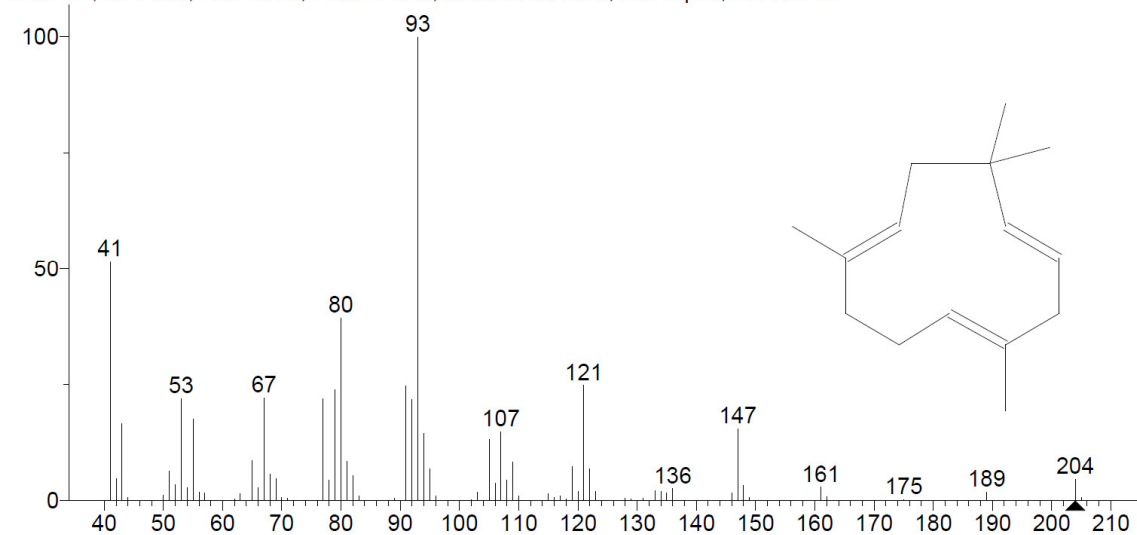

(replib) Humulene

**Figure S2.** Peak assignment identified from Humulene by GC-MS method.

Unknown; InLib=-151

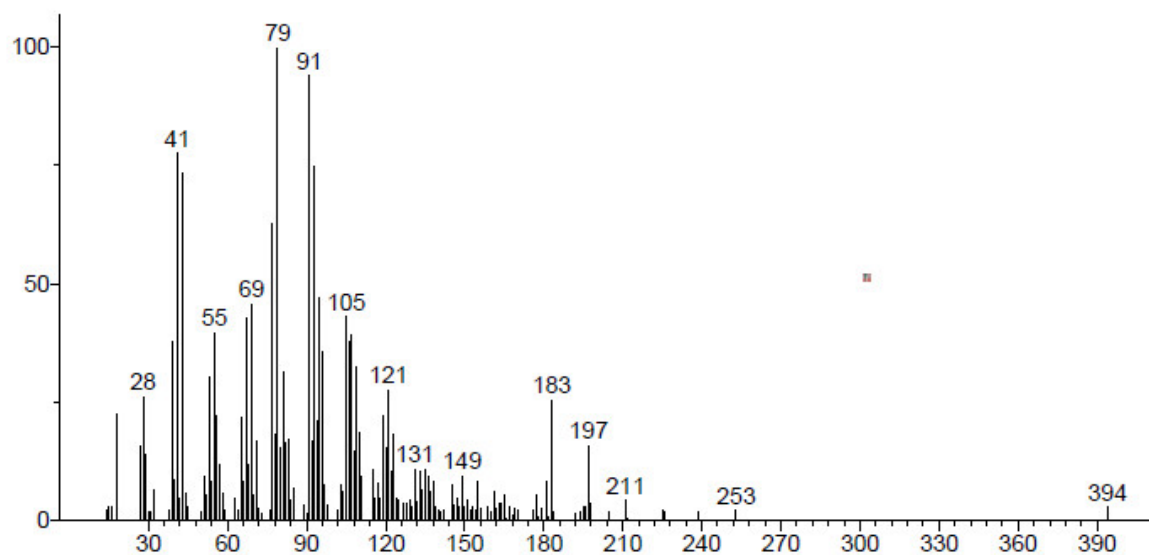

Hit 1 : Caryophyllene oxide

C<sub>15</sub>H<sub>24</sub>O; MF: 820; RMF: 884; Prob 35.3%; CAS: 1139-30-6; Lib: mainlib; ID: 5928.

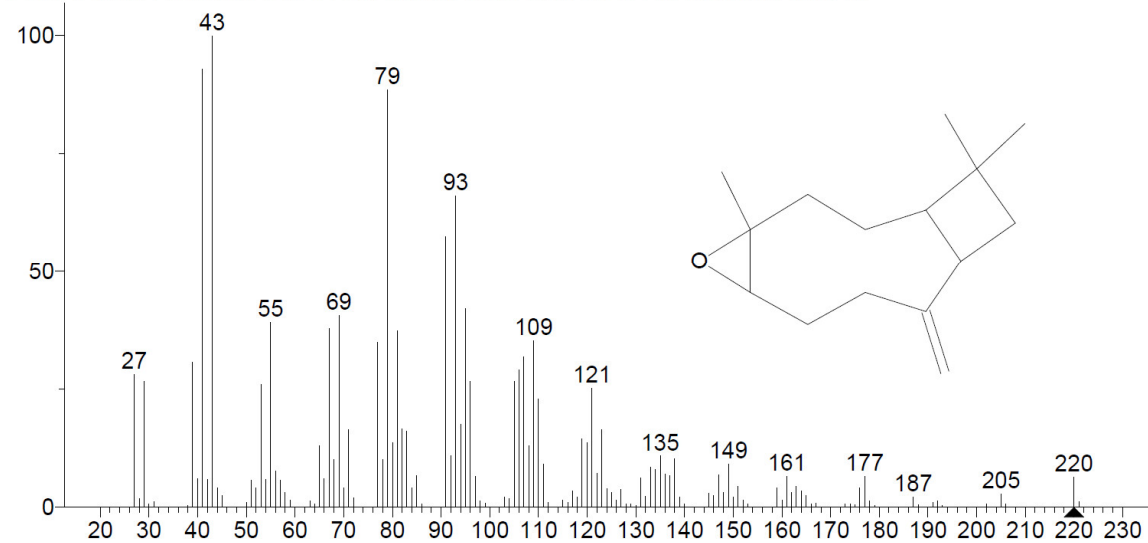

(mainlib) Caryophyllene oxide

**Figure S3.** Peak assignment identified from Caryophyllene oxide by GC-MS method

Unknown; InLib=-1103

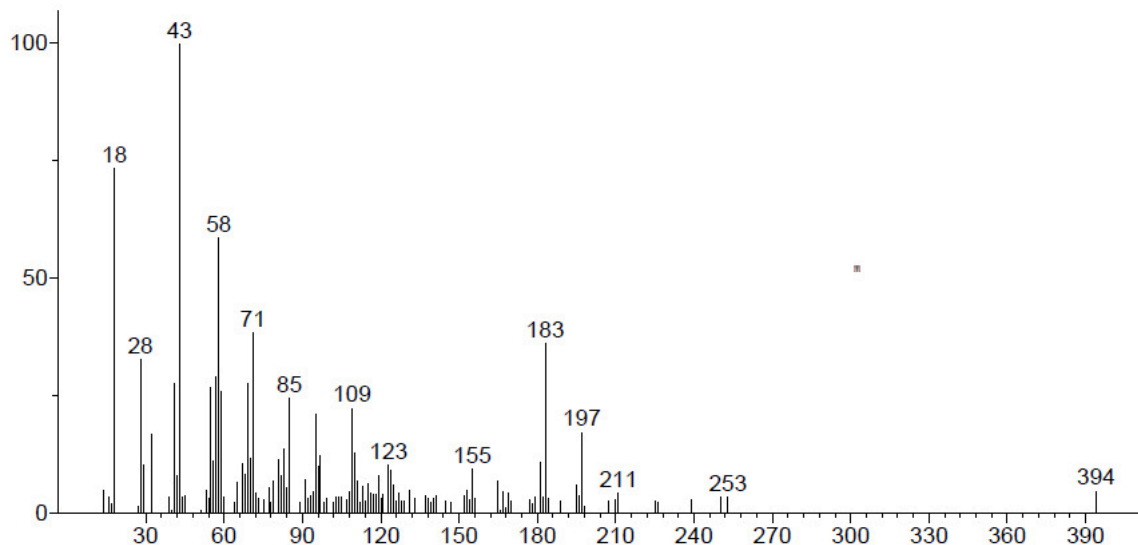

(Text File) Scan 1708 (20.723 min): THTRA03.D

Hit 1 : 2-Methyl-cis-7,8-epoxynonadecane  
C<sub>20</sub>H<sub>40</sub>O; MF: 657; RMF: 666; Prob 19.7%; Lib: mainlib; ID: 7392.

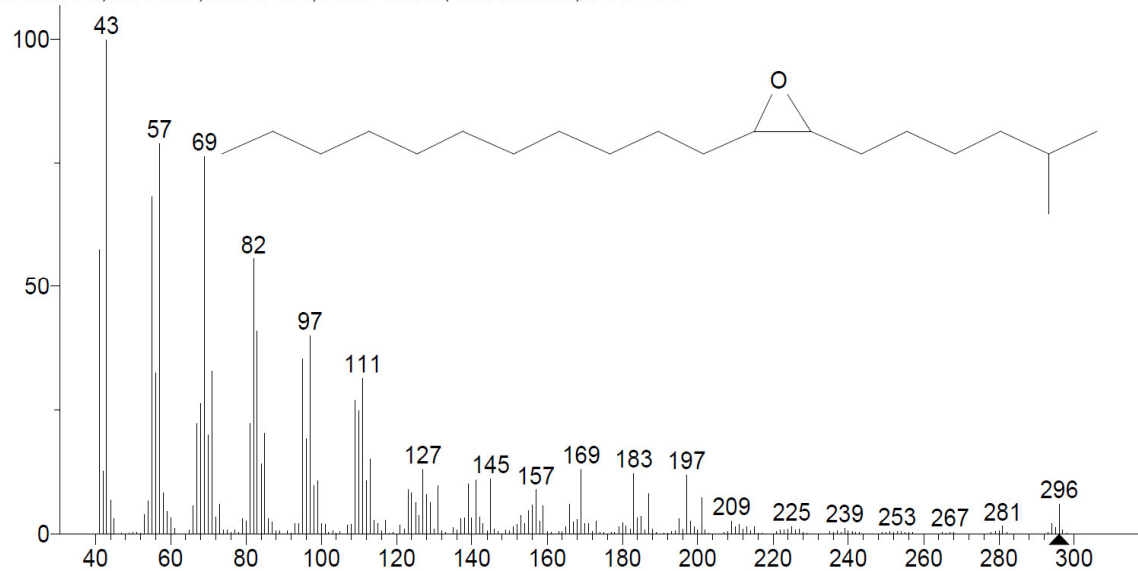

(mainlib) 2-Methyl-cis-7,8-epoxynonadecane

**Figure S4.** Peak assignment identified from 2-Methyl-cis-7,8-epoxynonadecane by GC-MS method.

Unknown; InLib=-372

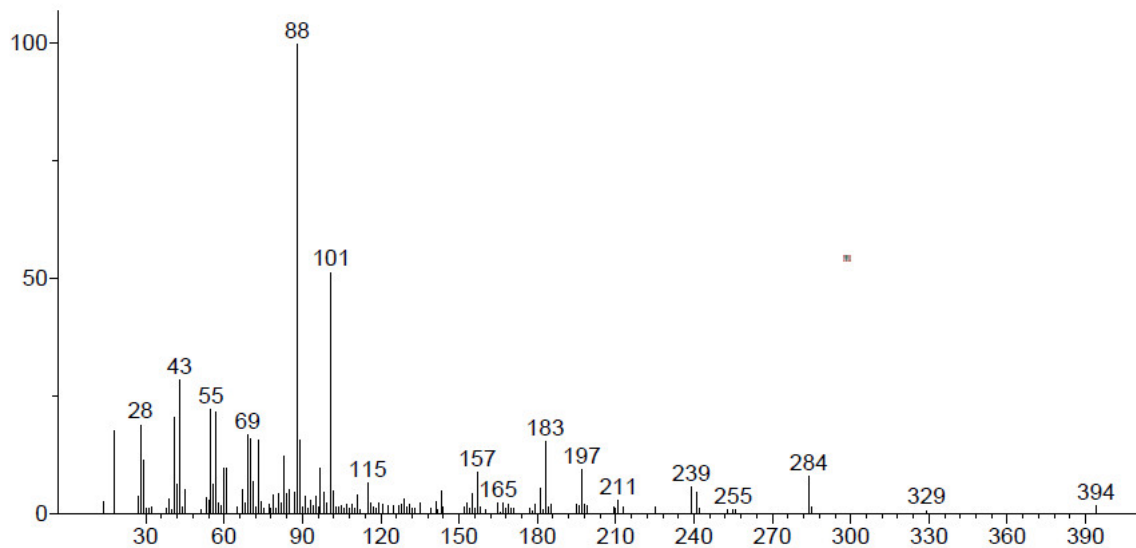

(Text File) Scan 1862 (22.324 min): THTRA03.D

Hit 1 : Hexadecanoic acid, ethyl ester

C<sub>18</sub>H<sub>36</sub>O<sub>2</sub>; MF: 757; RMF: 765; Prob 46.3%; CAS: 628-97-7; Lib: replib; ID: 12003.

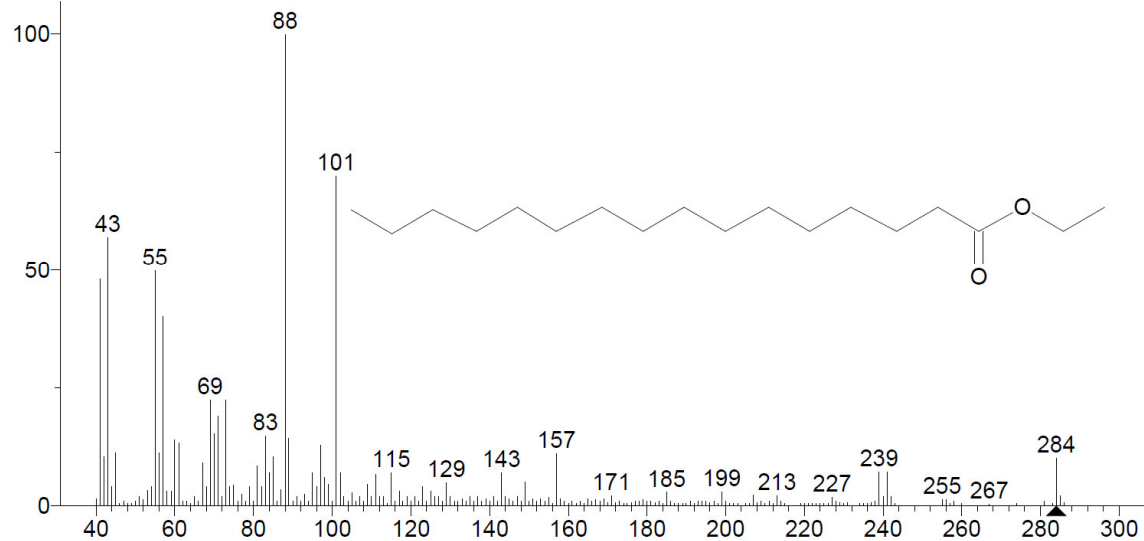

(replib) Hexadecanoic acid, ethyl ester

**Figure S5.** Peak assignment identified from Hexadecanoic acid, ethyl ester by GC-MS method.

Unknown; InLib=-526

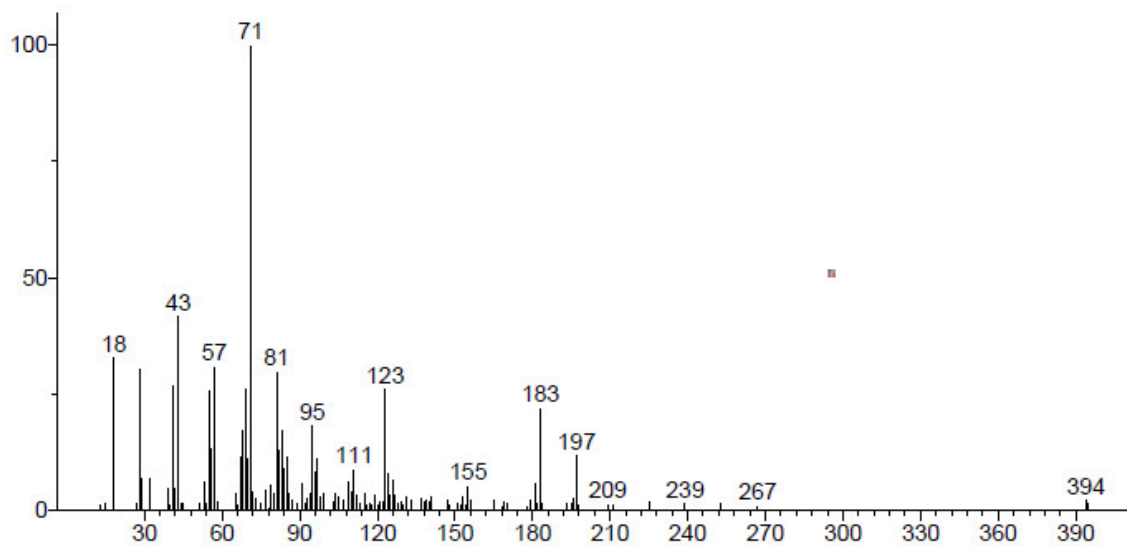

(Text File) Scan 1979 (23.540 min): THTRA03.D

Hit 1 : Phytol

C<sub>20</sub>H<sub>40</sub>O; MF: 728; RMF: 897; Prob 38.0%; CAS: 150-86-7; Lib: replib; ID: 8578.

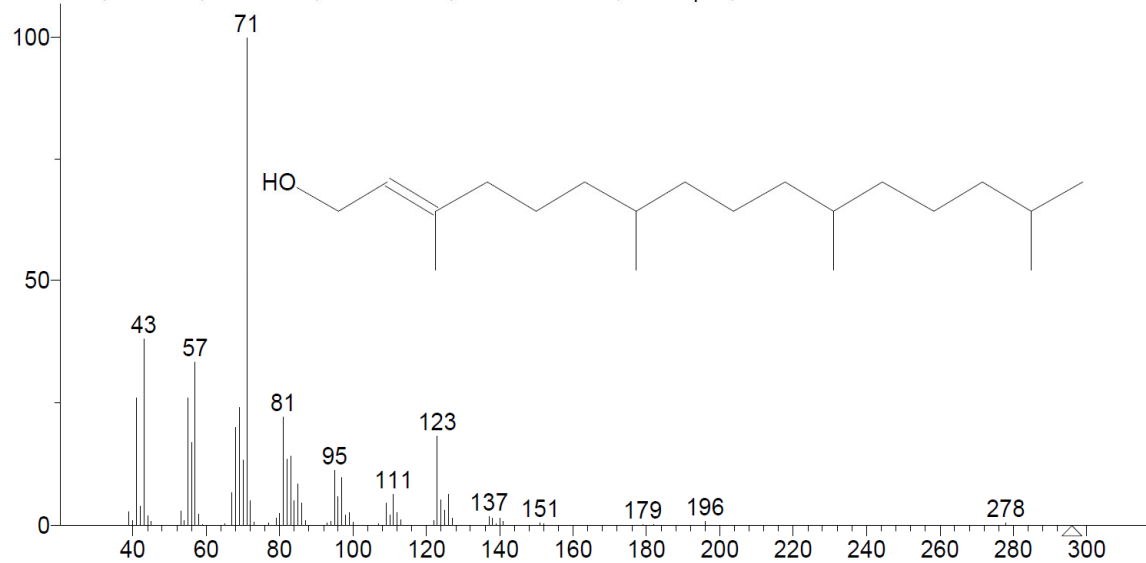

(replib) Phytol

**Figure S6.** Peak assignment identified from Phytol, ethyl ester by GC-MS method

Unknown; InLib=-1302

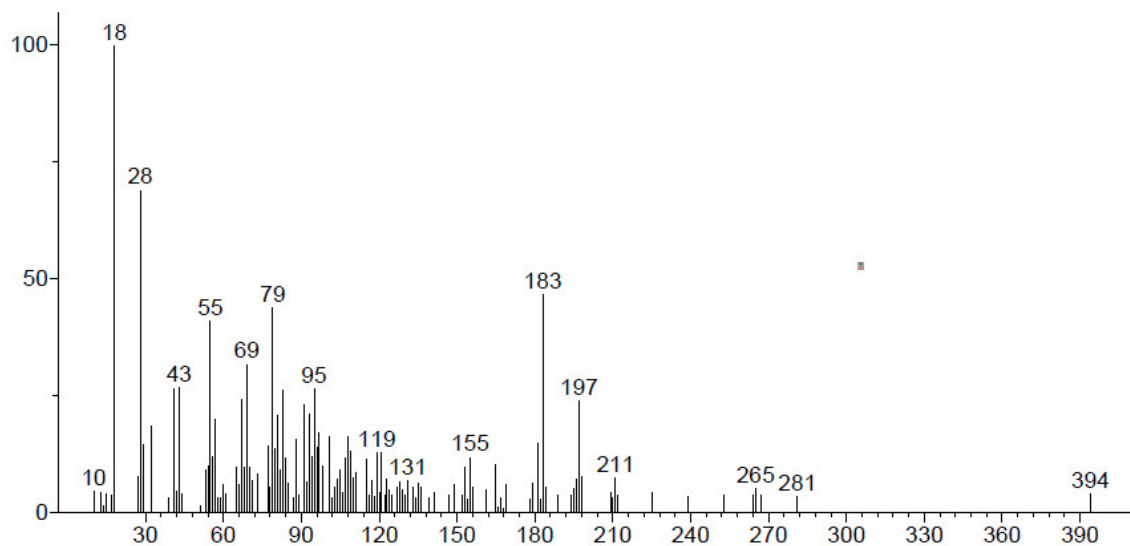

(Text File) Scan 2031 (24.080 min): THTRA03.D

Hit 1 : Oxiraneundecanoic acid, 3-pentyl-, methyl ester, trans-  
C<sub>19</sub>H<sub>36</sub>O<sub>3</sub>; MF: 626; RMF: 631; Prob 17.7%; CAS: 38520-31-9; Lib: mainlib; ID: 17744.

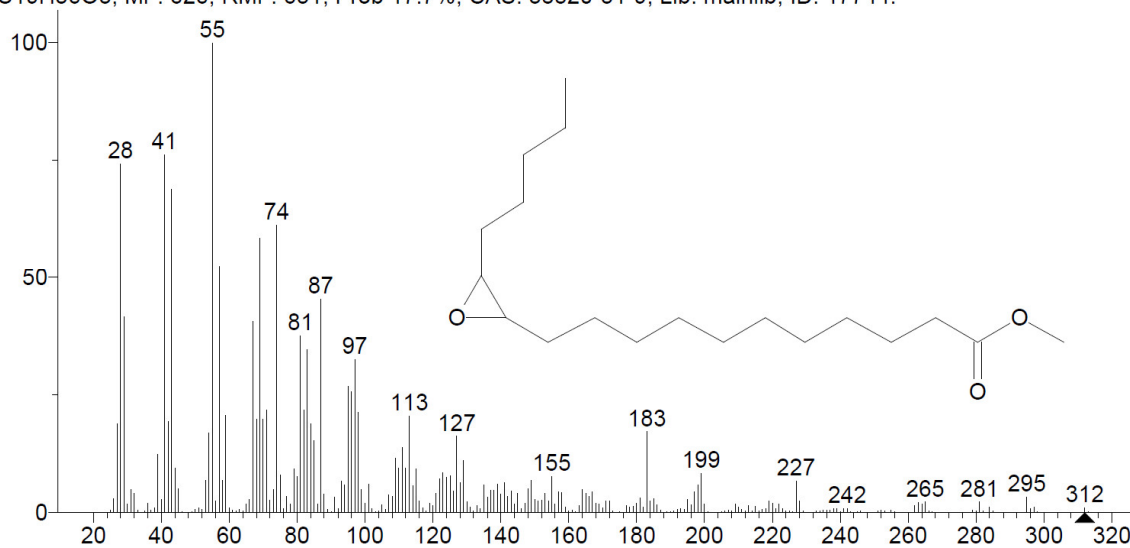

(mainlib) Oxiraneundecanoic acid, 3-pentyl-, methyl ester, trans-

**Figure S7.** Peak assignment identified from Oxiraneundecanoic acid, 3-pentyl-, methyl ester, *trans*-, ethyl ester by GC-MS method



Unknown; InLib=-1647

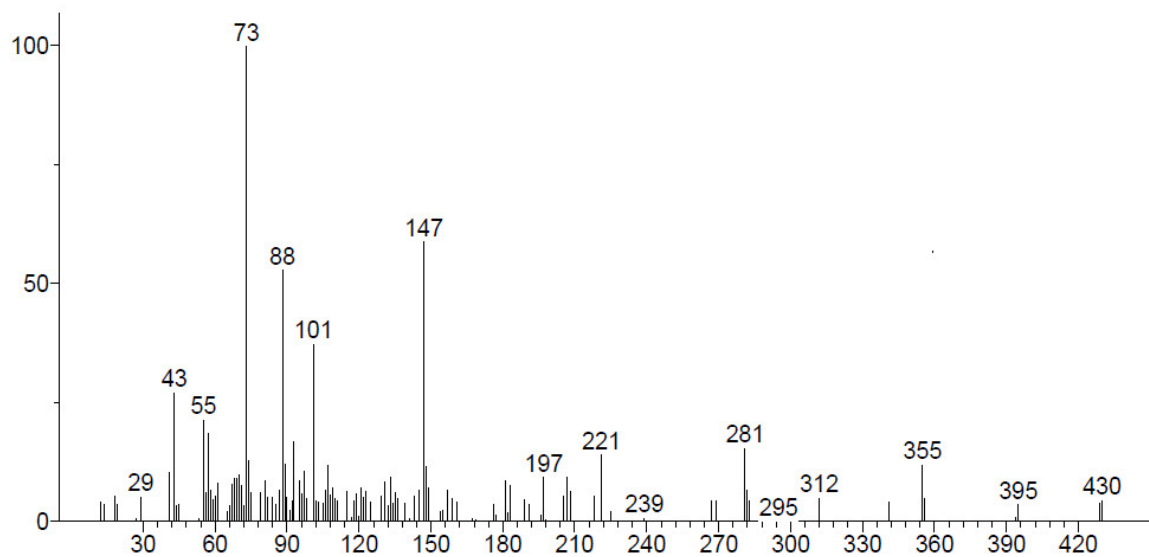

(Text File) Scan 2053 (24.309 min): THTRA03.D

Hit 6 : Hexadecanoic acid, ethyl ester  
C<sub>18</sub>H<sub>36</sub>O<sub>2</sub>; MF: 496; RMF: 548; Prob 3.31%; CAS: 628-97-7; Lib: replib; ID: 12003.

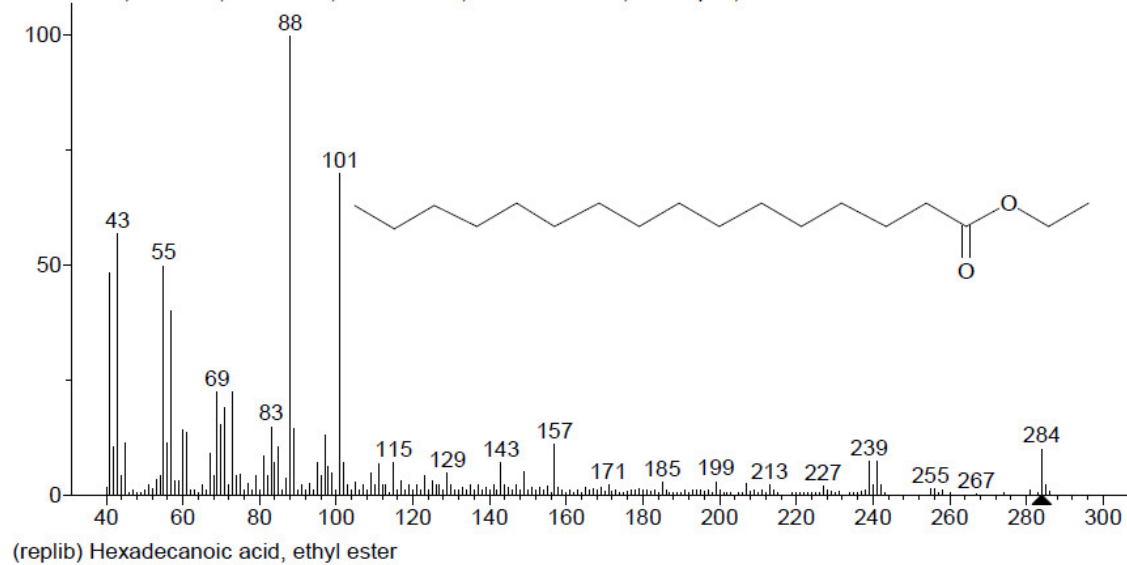

**Figure S8.** Peak assignment identified from hexadecanoic acid, ethyl ester by GC-MS method

Unknown; InLib=-367

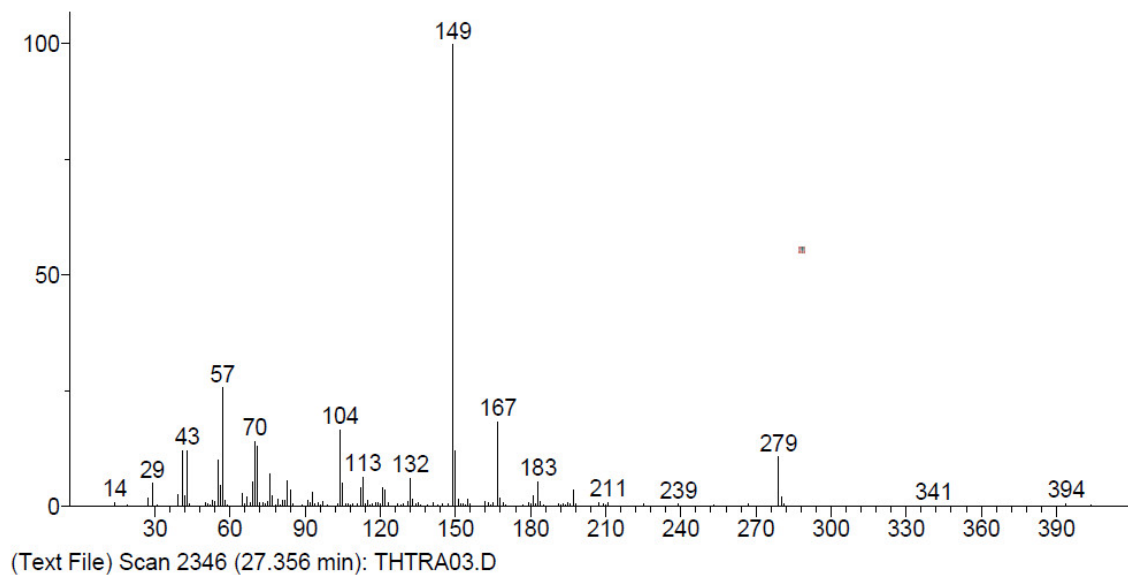

Hit 1 : Diisooctyl phthalate  
C<sub>24</sub>H<sub>38</sub>O<sub>4</sub>; MF: 828; RMF: 947; Prob 29.2%; CAS: 131-20-4; Lib: replib; ID: 21799.

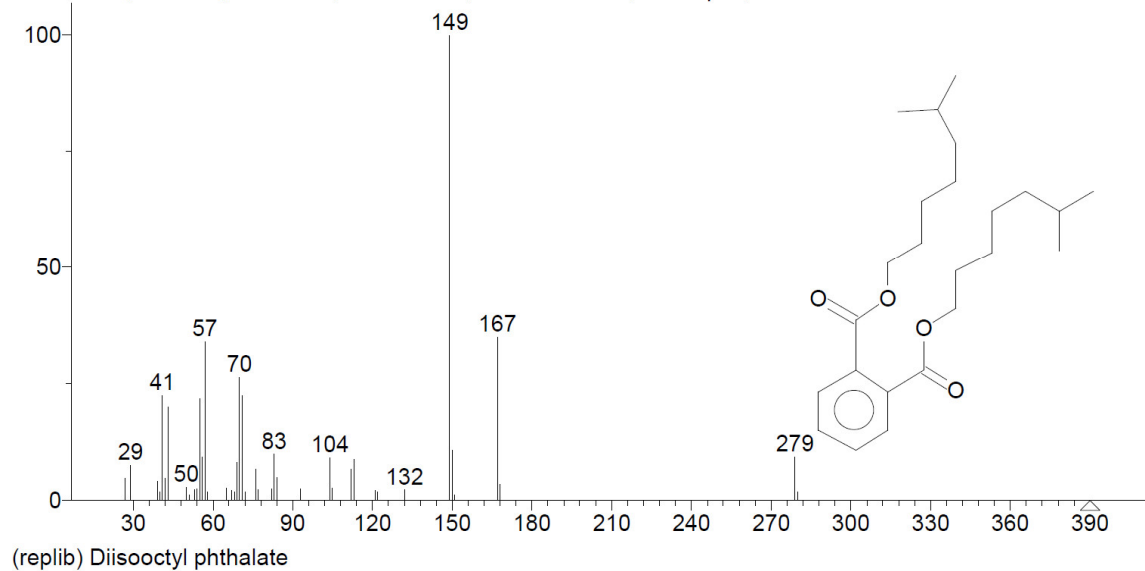

**Figure S9.** Peak assignment identified from Diisooctyl phthalate, ethyl ester by GC-MS method

Unknown; InLib=-155

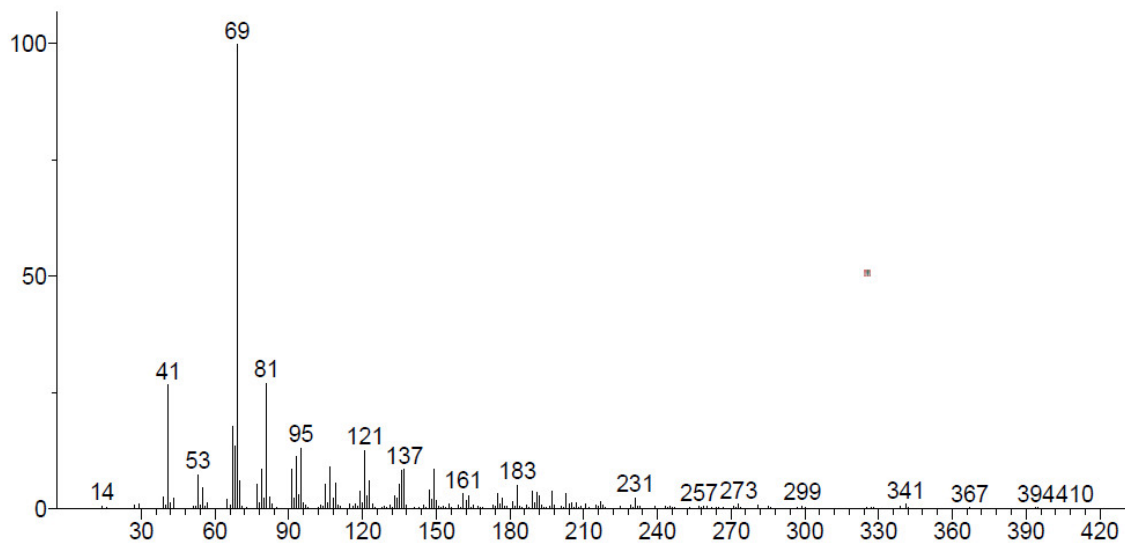

(Text File) Scan 2580 (29.789 min): THTRA03.D

Hit 1 : Squalene

C<sub>30</sub>H<sub>50</sub>; MF: 853; RMF: 904; Prob 52.1%; CAS: 111-02-4; Lib: mainlib; ID: 32442.

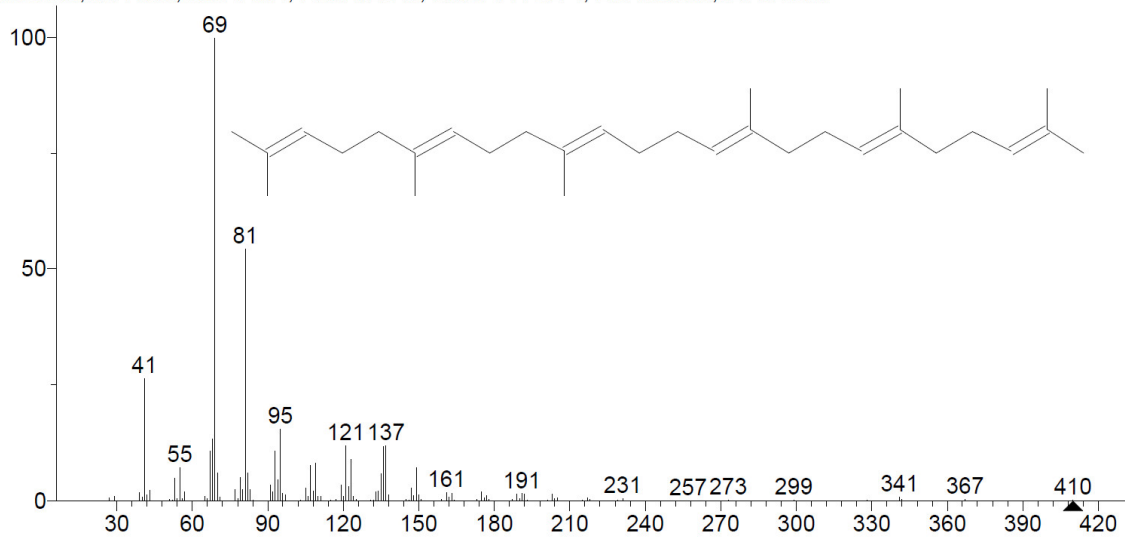

(mainlib) Squalene

**Figure S10.** Peak assignment identified from Squalene by GC-MS method

Unknown; InLib=-1120

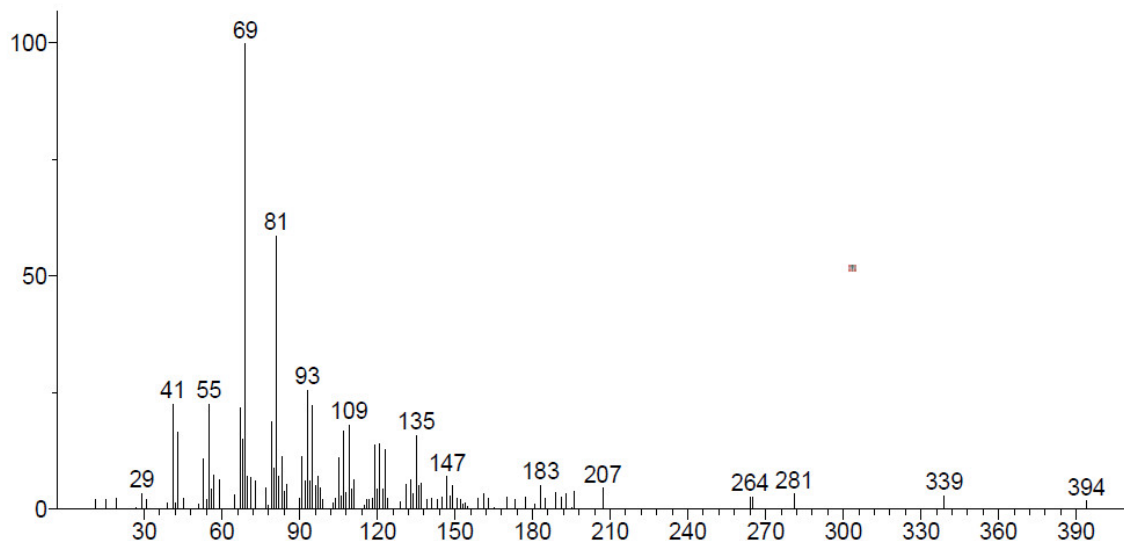

(Text File) Scan 2678 (30.808 min): THTRA03.D

Hit 1 : *trans*-Geranylgeraniol

C<sub>20</sub>H<sub>34</sub>O; MF: 731; RMF: 780; Prob 4.95%; CAS: 24034-73-9; Lib: mainlib; ID: 32444.

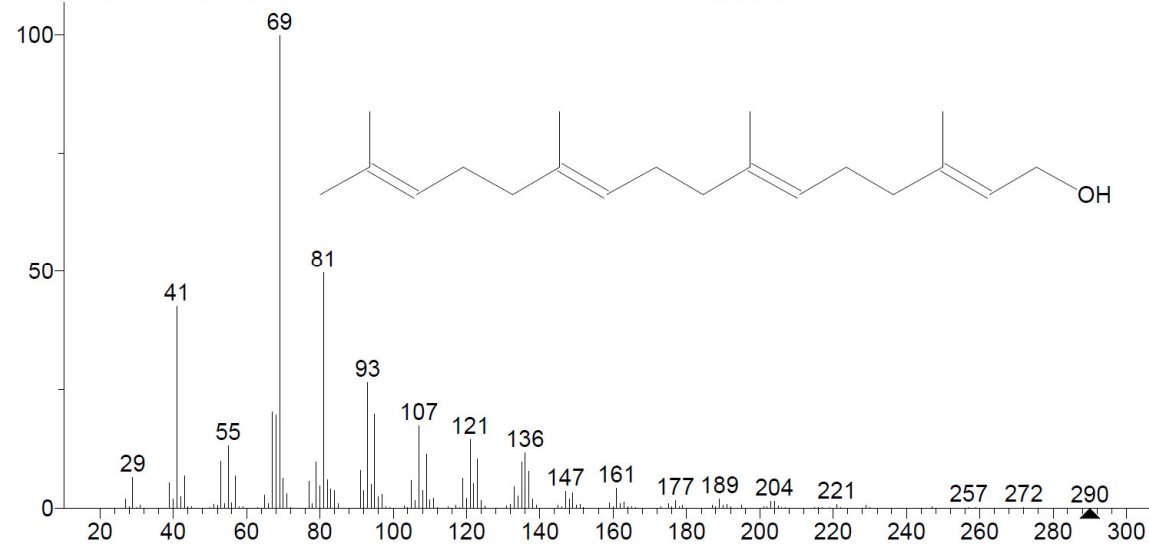

(mainlib) *trans*-Geranylgeraniol

**Figure S11.** Peak assignment identified from *trans*-Geranylgeraniol by GC-MS method

Unknown; InLib=-372

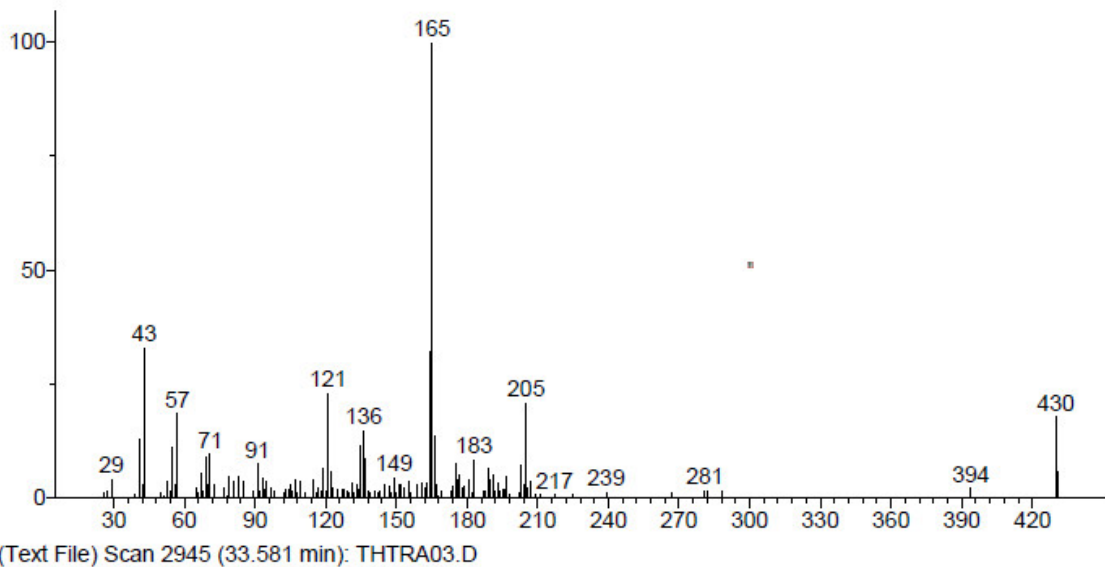

Hit 1 : Vitamin E

C<sub>29</sub>H<sub>50</sub>O<sub>2</sub>; MF: 757; RMF: 769; Prob 46.4%; CAS: 59-02-9; Lib: replib; ID: 23503.

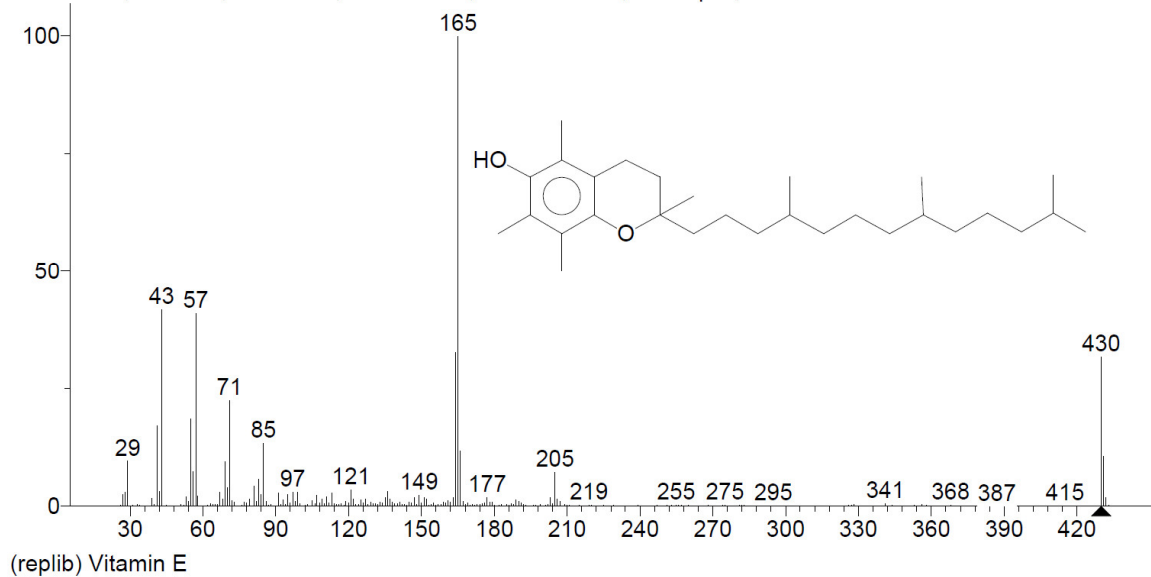

**Figure S12.** Peak assignment identified from Vitamin E by GC-MS method

Unknown; InLib=-825

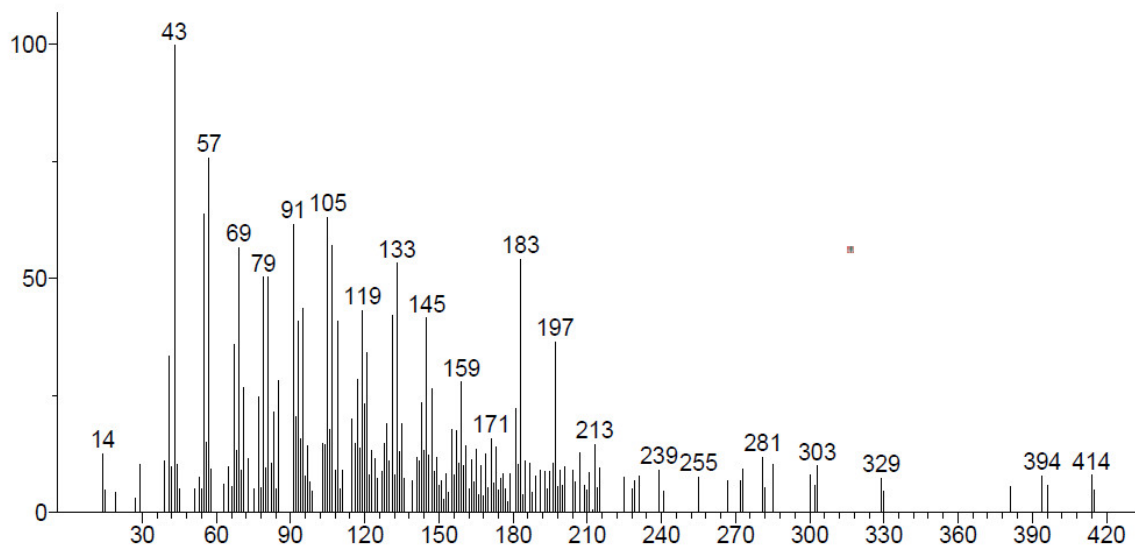

Hit 1 : Retinol, acetate

C<sub>22</sub>H<sub>32</sub>O<sub>2</sub>; MF: 726; RMF: 797; Prob 15.6%; CAS: 127-47-9; Lib: replib; ID: 1846.

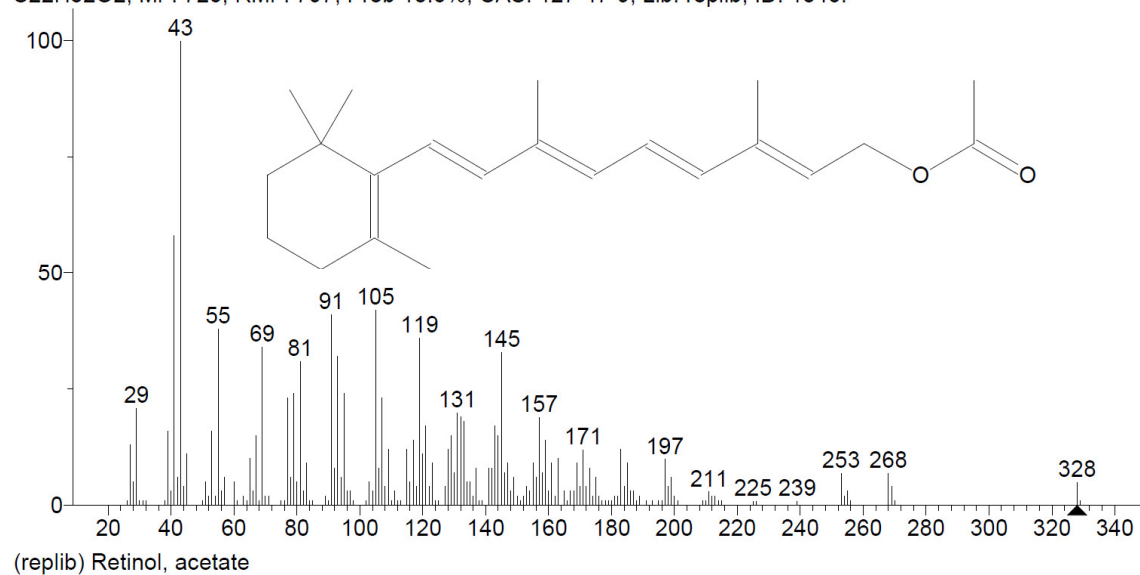

**Figure S13.** Peak assignment identified from Retinol, acetate by GC-MS method

Unknown; InLib=-1416

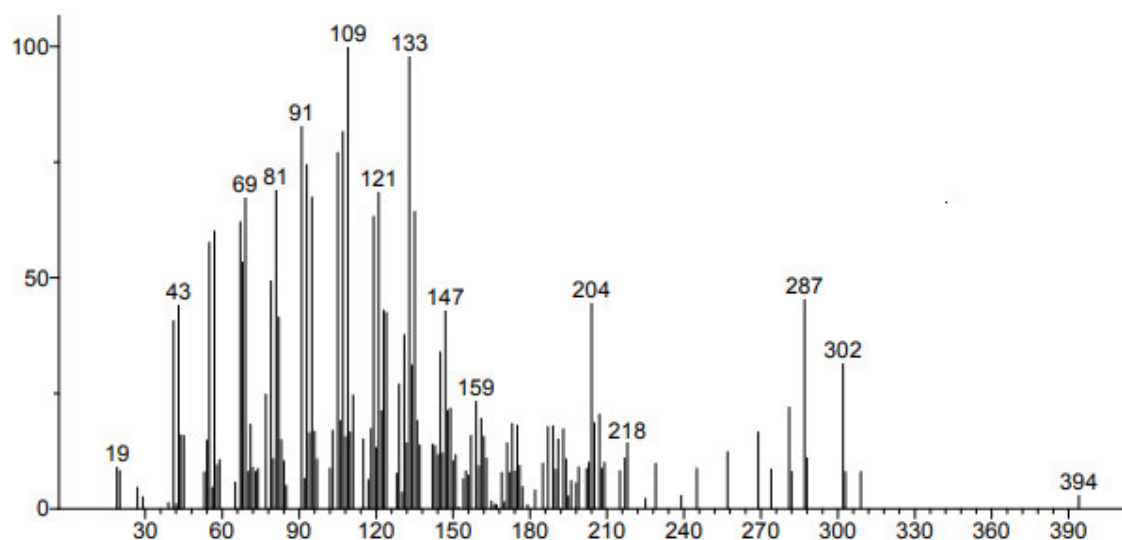

(Text File) Scan 3360 (37.895 min): THTRA03.D

140 m/z Values and Intensities:

|         |         |         |         |         |
|---------|---------|---------|---------|---------|
| 19 91   | 20 82   | 27 46   | 29 25   | 39 13   |
| 41 406  | 42 10   | 43 444  | 44 159  | 45 158  |
| 53 79   | 54 148  | 55 576  | 56 46   | 57 600  |
| 58 95   | 59 106  | 65 57   | 67 620  | 68 532  |
| 69 672  | 70 80   | 71 182  | 72 88   | 73 80   |
| 74 86   | 77 247  | 79 492  | 80 108  | 81 689  |
| 82 414  | 83 149  | 84 103  | 85 50   | 91 830  |
| 92 65   | 93 743  | 94 164  | 95 673  | 96 167  |
| 97 107  | 102 87  | 103 169 | 105 770 | 106 190 |
| 107 815 | 108 155 | 109 999 | 110 166 | 111 245 |
| 115 151 | 116 1   | 117 63  | 118 173 | 119 632 |
| 120 132 | 121 688 | 122 211 | 123 429 | 124 424 |
| 128 76  | 129 269 | 130 35  | 131 376 | 132 142 |
| 133 980 | 134 310 | 135 642 | 136 190 | 137 137 |
| 142 139 | 143 136 | 144 116 | 145 339 | 146 120 |
| 147 430 | 148 212 | 149 217 | 150 103 | 151 116 |
| 152 3   | 154 64  | 155 81  | 156 72  | 157 158 |
| 159 235 | 160 92  | 161 195 | 162 156 | 163 109 |
| 165 16  | 166 9   | 167 8   | 169 78  | 170 14  |
| 171 142 | 172 78  | 173 184 | 174 81  | 175 180 |
| 176 93  | 177 47  | 179 8   | 182 40  | 185 98  |
| 187 177 | 189 179 | 190 85  | 191 150 | 193 172 |
| 194 107 | 195 27  | 196 60  | 198 55  | 199 90  |
| 202 86  | 203 100 | 204 446 | 205 185 | 207 204 |
| 208 87  | 209 100 | 215 82  | 217 109 | 218 143 |
| 225 22  | 229 98  | 239 28  | 245 87  | 257 123 |
| 269 166 | 274 85  | 281 219 | 282 80  | 287 454 |
| 288 110 | 302 314 | 303 80  | 309 80  | 394 32  |

Figure S14. Peak assignment identified from  $\gamma$ -himachalene by GC-MS method (*continuing*)

Hit 10 :  $\gamma$ -HIMACHALENE  
C<sub>15</sub>H<sub>24</sub>; MF: 649; RMF: 750; Prob 2.16%; Lib: mainlib; ID: 89412.

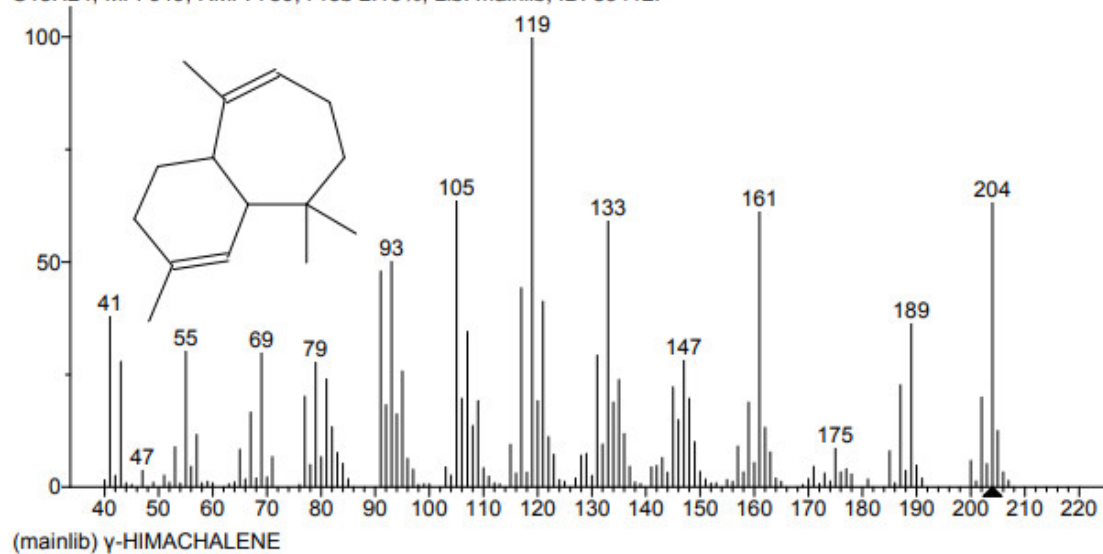

**Figure S14.** Peak assignment identified from  $\gamma$ -himachalene by GC-MS method
